# Supplementary material for: A Cohort Study of Korean Radiation Workers: Baseline Characteristics of Participants
Source: MDPI journal article supplement (doi:10.3390/ijerph17072328), 2020-03-30
Supplement: s1 [file s1]

Supplemental Table S1. Demographic characteristics and occupational history by occupation.

|                                    | Public<br>Institute<br>(n = 676) |         | Education<br>Institute<br>(n = 2010) |         | Military<br>(n = 165) |         | Industrial<br>Radiography<br>(n = 3517) |         | Industry<br>(n = 3886) |         | Research<br>Institute<br>(n = 1139) |         | Nuclear Power<br>Plant<br>(n = 6328) |         | Medical<br>Institute<br>(n = 2887) |         |
|------------------------------------|----------------------------------|---------|--------------------------------------|---------|-----------------------|---------|-----------------------------------------|---------|------------------------|---------|-------------------------------------|---------|--------------------------------------|---------|------------------------------------|---------|
| Demographic characteristics        |                                  |         |                                      |         |                       |         |                                         |         |                        |         |                                     |         |                                      |         |                                    |         |
| Sex                                |                                  |         |                                      |         |                       |         |                                         |         |                        |         |                                     |         |                                      |         |                                    |         |
| Men                                | 592                              | (87.6%) | 1257                                 | (62.5%) | 153                   | (92.7%) | 3397                                    | (96.6%) | 3709                   | (95.4%) | 932                                 | (81.8%) | 6146                                 | (97.1%) | 1645                               | (57.0%) |
| Women                              | 84                               | (12.4%) | 753                                  | (37.5%) | 12                    | (7.3%)  | 120                                     | (3.4%)  | 177                    | (4.6%)  | 207                                 | (18.2%) | 182                                  | (2.9%)  | 1242                               | (43.0%) |
| Birth year                         |                                  |         |                                      |         |                       |         |                                         |         |                        |         |                                     |         |                                      |         |                                    |         |
| ~1960                              | 49                               | (7.2%)  | 60                                   | (3.0%)  | 1                     | (0.6%)  | 93                                      | (2.6%)  | 184                    | (4.7%)  | 182                                 | (16.0%) | 681                                  | (10.8%) | 141                                | (4.9%)  |
| 1961-1970                          | 146                              | (21.6%) | 149                                  | (7.4%)  | 16                    | (9.7%)  | 309                                     | (8.8%)  | 783                    | (20.1%) | 210                                 | (18.4%) | 1364                                 | (21.6%) | 472                                | (16.3%) |
| 1971-1980                          | 160                              | (23.7%) | 309                                  | (15.4%) | 41                    | (24.8%) | 1174                                    | (33.4%) | 1240                   | (31.9%) | 290                                 | (25.5%) | 1865                                 | (29.5%) | 812                                | (28.1%) |
| 1981~                              | 321                              | (47.5%) | 1492                                 | (74.2%) | 107                   | (64.8%) | 1941                                    | (55.2%) | 1679                   | (43.2%) | 457                                 | (40.1%) | 2418                                 | (38.2%) | 1462                               | (50.6%) |
| Education level                    |                                  |         |                                      |         |                       |         |                                         |         |                        |         |                                     |         |                                      |         |                                    |         |
| Less than high school graduation   | 4                                | (0.6%)  | 0                                    | (0.0%)  | 0                     | (0.0%)  | 15                                      | (0.4%)  | 21                     | (0.6%)  | 0                                   | (0.0%)  | 113                                  | (1.8%)  | 6                                  | (0.2%)  |
| High school graduation             | 132                              | (19.8%) | 240                                  | (12.5%) | 45                    | (28.3%) | 1215                                    | (35.5%) | 1321                   | (35.0%) | 28                                  | (2.5%)  | 1504                                 | (24.2%) | 54                                 | (1.9%)  |
| College graduation and above       | 532                              | (79.6%) | 1682                                 | (87.5%) | 114                   | (71.7%) | 2197                                    | (64.1%) | 2431                   | (64.4%) | 1101                                | (97.5%) | 4602                                 | (74.0%) | 2743                               | (97.9%) |
| Marital status                     |                                  |         |                                      |         |                       |         |                                         |         |                        |         |                                     |         |                                      |         |                                    |         |
| Unmarried                          | 237                              | (35.5%) | 1293                                 | (67.1%) | 75                    | (46.9%) | 1789                                    | (52.1%) | 1146                   | (30.4%) | 343                                 | (30.4%) | 1948                                 | (31.4%) | 1050                               | (37.5%) |
| Married/living together            | 425                              | (63.6%) | 626                                  | (32.5%) | 83                    | (51.9%) | 1604                                    | (46.7%) | 2590                   | (68.6%) | 778                                 | (69.0%) | 4138                                 | (66.7%) | 1737                               | (62.0%) |
| Other (divorced, widow, separated) | 6                                | (0.9%)  | 9                                    | (0.5%)  | 2                     | (1.3%)  | 42                                      | (1.2%)  | 37                     | (1.0%)  | 7                                   | (0.6%)  | 116                                  | (1.9%)  | 14                                 | (0.5%)  |
| BMI, kg/m2                         |                                  |         |                                      |         |                       |         |                                         |         |                        |         |                                     |         |                                      |         |                                    |         |
| Underweight (<18.5)                | 21                               | (3.3%)  | 104                                  | (6.0%)  | 0                     | (0.0%)  | 64                                      | (1.9%)  | 40                     | (1.1%)  | 39                                  | (3.7%)  | 77                                   | (1.3%)  | 145                                | (5.6%)  |
| Normal weight (18.5–24.9)          | 431                              | (66.8%) | 1173                                 | (67.5%) | 101                   | (65.6%) | 1756                                    | (53.3%) | 2087                   | (58.0%) | 681                                 | (64.5%) | 3633                                 | (60.5%) | 1815                               | (69.9%) |
| Overweight (25.0–29.9)             | 175                              | (27.1%) | 394                                  | (22.7%) | 46                    | (29.9%) | 1211                                    | (36.7%) | 1294                   | (35.9%) | 299                                 | (28.3%) | 2019                                 | (33.6%) | 574                                | (22.1%) |
| Obese (≥30.0)                      | 18                               | (2.8%)  | 67                                   | (3.9%)  | 7                     | (4.5%)  | 266                                     | (8.1%)  | 180                    | (5.0%)  | 36                                  | (3.4%)  | 275                                  | (4.6%)  | 64                                 | (2.5%)  |
| Regular exercise                   |                                  |         |                                      |         |                       |         |                                         |         |                        |         |                                     |         |                                      |         |                                    |         |
| No                                 | 270                              | (40.2%) | 1059                                 | (53.1%) | 24                    | (14.5%) | 1847                                    | (53.0%) | 1633                   | (42.4%) | 461                                 | (40.8%) | 2387                                 | (38.0%) | 1380                               | (48.1%) |
| Yes                                | 402                              | (59.8%) | 934                                  | (46.9%) | 141                   | (85.5%) | 1641                                    | (47.0%) | 2215                   | (57.6%) | 670                                 | (59.2%) | 3890                                 | (62.0%) | 1492                               | (51.9%) |
| Smoking status                     |                                  |         |                                      |         |                       |         |                                         |         |                        |         |                                     |         |                                      |         |                                    |         |
| Never (non-smoker)                 | 279                              | (41.7%) | 1364                                 | (68.5%) | 90                    | (54.5%) | 893                                     | (25.6%) | 1274                   | (33.1%) | 559                                 | (49.5%) | 2079                                 | (33.2%) | 1904                               | (66.4%) |
| Ex-smoker                          | 133                              | (19.9%) | 192                                  | (9.6%)  | 20                    | (12.1%) | 565                                     | (16.2%) | 802                    | (20.8%) | 217                                 | (19.2%) | 1303                                 | (20.8%) | 383                                | (13.4%) |

|                                                               | Public<br>Institute<br>(n = 676) |         | Education<br>Institute<br>(n = 2010) |         | Military<br>(n = 165) |         | Industrial<br>Radiography<br>(n = 3517) |         | Industry<br>(n = 3886) |         | Research<br>Institute<br>(n = 1139) |         | Nuclear Power<br>Plant<br>(n = 6328) |         | Medical<br>Institute<br>(n = 2887) |         |
|---------------------------------------------------------------|----------------------------------|---------|--------------------------------------|---------|-----------------------|---------|-----------------------------------------|---------|------------------------|---------|-------------------------------------|---------|--------------------------------------|---------|------------------------------------|---------|
| Yes (smoker)                                                  | 257                              | (38.4%) | 434                                  | (21.8%) | 55                    | (33.3%) | 2029                                    | (58.2%) | 1776                   | (46.1%) | 353                                 | (31.3%) | 2878                                 | (46.0%) | 579                                | (20.2%) |
| Alcohol status                                                |                                  |         |                                      |         |                       |         |                                         |         |                        |         |                                     |         |                                      |         |                                    |         |
| No                                                            | 108                              | (16.0%) | 381                                  | (19.1%) | 23                    | (13.9%) | 528                                     | (15.1%) | 517                    | (13.4%) | 208                                 | (18.3%) | 895                                  | (14.2%) | 616                                | (21.4%) |
| Yes                                                           | 567                              | (84.0%) | 1616                                 | (80.9%) | 142                   | (86.1%) | 2972                                    | (84.9%) | 3346                   | (86.6%) | 929                                 | (81.7%) | 5403                                 | (85.8%) | 2264                               | (78.6%) |
| Experience with thyroid cancer screening (thyroid ultrasound) |                                  |         |                                      |         |                       |         |                                         |         |                        |         |                                     |         |                                      |         |                                    |         |
| Never                                                         | 524                              | (83.0%) | 1538                                 | (86.0%) | 143                   | (87.7%) | 3164                                    | (94.2%) | 2551                   | (71.6%) | 641                                 | (60.6%) | 3424                                 | (58.5%) | 2115                               | (77.8%) |
| 1 time                                                        | 71                               | (11.3%) | 157                                  | (8.8%)  | 9                     | (5.5%)  | 139                                     | (4.1%)  | 555                    | (15.6%) | 200                                 | (18.9%) | 1115                                 | (19.1%) | 364                                | (13.4%) |
| 2 times                                                       | 15                               | (2.4%)  | 40                                   | (2.2%)  | 6                     | (3.7%)  | 31                                      | (0.9%)  | 181                    | (5.1%)  | 64                                  | (6.1%)  | 491                                  | (8.4%)  | 128                                | (4.7%)  |
| 3 times                                                       | 21                               | (3.3%)  | 54                                   | (3.0%)  | 5                     | (3.1%)  | 26                                      | (0.8%)  | 274                    | (7.7%)  | 152                                 | (14.4%) | 824                                  | (14.1%) | 110                                | (4.1%)  |
| Occupational history                                          |                                  |         |                                      |         |                       |         |                                         |         |                        |         |                                     |         |                                      |         |                                    |         |
| Calendar year of hiring                                       |                                  |         |                                      |         |                       |         |                                         |         |                        |         |                                     |         |                                      |         |                                    |         |
| ~1989                                                         | 75                               | (11.1%) | 6                                    | (0.3%)  | 0                     | (0.0%)  | 173                                     | (4.9%)  | 98                     | (2.5%)  | 163                                 | (14.3%) | 630                                  | (10.0%) | 127                                | (4.4%)  |
| 1990–1999                                                     | 93                               | (13.8%) | 108                                  | (5.4%)  | 5                     | (3.0%)  | 479                                     | (13.6%) | 410                    | (10.6%) | 143                                 | (12.6%) | 1133                                 | (17.9%) | 323                                | (11.2%) |
| 2000–2009                                                     | 114                              | (16.9%) | 274                                  | (13.6%) | 60                    | (36.4%) | 1006                                    | (28.6%) | 823                    | (21.2%) | 270                                 | (23.7%) | 1293                                 | (20.4%) | 729                                | (25.3%) |
| 2010~                                                         | 394                              | (58.3%) | 1622                                 | (80.7%) | 100                   | (60.6%) | 1859                                    | (52.9%) | 2555                   | (65.7%) | 563                                 | (49.4%) | 3272                                 | (51.7%) | 1708                               | (59.2%) |
| Age at the started of radiation work                          |                                  |         |                                      |         |                       |         |                                         |         |                        |         |                                     |         |                                      |         |                                    |         |
| <20                                                           | 4                                | (0.6%)  | 68                                   | (3.4%)  | 23                    | (13.9%) | 277                                     | (7.9%)  | 44                     | (1.1%)  | 0                                   | (0.0%)  | 363                                  | (5.7%)  | 6                                  | (0.2%)  |
| 20–29                                                         | 444                              | (65.7%) | 1471                                 | (73.2%) | 90                    | (54.5%) | 2430                                    | (69.1%) | 1683                   | (43.3%) | 573                                 | (50.3%) | 3619                                 | (57.2%) | 1858                               | (64.4%) |
| 30–39                                                         | 152                              | (22.5%) | 322                                  | (16.0%) | 35                    | (21.2%) | 738                                     | (21.0%) | 1489                   | (38.3%) | 462                                 | (40.6%) | 1553                                 | (24.5%) | 698                                | (24.2%) |
| 40–49                                                         | 54                               | (8.0%)  | 112                                  | (5.6%)  | 15                    | (9.1%)  | 54                                      | (1.5%)  | 511                    | (13.1%) | 86                                  | (7.6%)  | 491                                  | (7.8%)  | 242                                | (8.4%)  |
| ≥50                                                           | 22                               | (3.3%)  | 37                                   | (1.8%)  | 2                     | (1.2%)  | 18                                      | (0.5%)  | 159                    | (4.1%)  | 18                                  | (1.6%)  | 302                                  | (4.8%)  | 83                                 | (2.9%)  |
| Employment status                                             |                                  |         |                                      |         |                       |         |                                         |         |                        |         |                                     |         |                                      |         |                                    |         |
| Regular employment                                            | 567                              | (84.8%) | 695                                  | (43.7%) | 124                   | (75.6%) | 3397                                    | (98.5%) | 3685                   | (95.6%) | 781                                 | (69.8%) | 4973                                 | (79.9%) | 2228                               | (77.9%) |
| Irregular employment<br>(temporary contract)                  | 97                               | (14.5%) | 863                                  | (54.3%) | 40                    | (24.4%) | 48                                      | (1.4%)  | 150                    | (3.9%)  | 327                                 | (29.2%) | 743                                  | (11.9%) | 617                                | (21.6%) |
| Irregular employment<br>(daily contract)                      | 5                                | (0.7%)  | 32                                   | (2.0%)  | 0                     | (0.0%)  | 3                                       | (0.1%)  | 18                     | (0.5%)  | 11                                  | (1.0%)  | 505                                  | (8.1%)  | 15                                 | (0.5%)  |
| Duration of employment, years                                 |                                  |         |                                      |         |                       |         |                                         |         |                        |         |                                     |         |                                      |         |                                    |         |
| ≤4                                                            | 308                              | (45.6%) | 1281                                 | (63.7%) | 78                    | (47.3%) | 1294                                    | (36.8%) | 2062                   | (53.1%) | 446                                 | (39.2%) | 2485                                 | (39.3%) | 1311                               | (45.4%) |
| 5–9                                                           | 137                              | (20.3%) | 432                                  | (21.5%) | 42                    | (25.5%) | 904                                     | (25.7%) | 758                    | (19.5%) | 211                                 | (18.5%) | 1198                                 | (18.9%) | 628                                | (21.8%) |
| 10–14                                                         | 51                               | (7.5%)  | 143                                  | (7.1%)  | 38                    | (23.0%) | 534                                     | (15.2%) | 425                    | (10.9%) | 133                                 | (11.7%) | 698                                  | (11.0%) | 350                                | (12.1%) |
| ≥15 years                                                     | 180                              | (26.6%) | 154                                  | (7.7%)  | 7                     | (4.2%)  | 785                                     | (22.3%) | 641                    | (16.5%) | 349                                 | (30.6%) | 1947                                 | (30.8%) | 598                                | (20.7%) |

|                                                                                      | Public<br>Institute<br>(n = 676) |         | Education<br>Institute<br>(n = 2010) |         | Military<br>(n = 165) |         | Industrial<br>Radiography<br>(n = 3517) |         | Industry<br>(n = 3886) |         | Research<br>Institute<br>(n = 1139) |         | Nuclear Power<br>Plant<br>(n = 6328) |         | Medical<br>Institute<br>(n = 2887) |         |
|--------------------------------------------------------------------------------------|----------------------------------|---------|--------------------------------------|---------|-----------------------|---------|-----------------------------------------|---------|------------------------|---------|-------------------------------------|---------|--------------------------------------|---------|------------------------------------|---------|
| Experience of warning for exceeding 5mSv per quarter                                 |                                  |         |                                      |         |                       |         |                                         |         |                        |         |                                     |         |                                      |         |                                    |         |
| No                                                                                   | 611                              | (92.3%) | 1659                                 | (92.8%) | 157                   | (96.3%) | 2970                                    | (88.5%) | 3338                   | (87.8%) | 1066                                | (95.3%) | 5417                                 | (90.0%) | 2639                               | (93.1%) |
| Yes                                                                                  | 27                               | (4.1%)  | 15                                   | (0.8%)  | 3                     | (1.8%)  | 283                                     | (8.4%)  | 111                    | (2.9%)  | 19                                  | (1.7%)  | 369                                  | (6.1%)  | 74                                 | (2.6%)  |
| I don't know                                                                         | 24                               | (3.6%)  | 113                                  | (6.3%)  | 3                     | (1.8%)  | 103                                     | (3.1%)  | 353                    | (9.3%)  | 33                                  | (3.0%)  | 235                                  | (3.9%)  | 123                                | (4.3%)  |
| Night shifts                                                                         |                                  |         |                                      |         |                       |         |                                         |         |                        |         |                                     |         |                                      |         |                                    |         |
| None                                                                                 | 422                              | (62.9%) | 1639                                 | (83.8%) | 115                   | (71.4%) | 922                                     | (26.6%) | 1630                   | (42.5%) | 938                                 | (83.0%) | 2949                                 | (47.5%) | 1746                               | (61.2%) |
| <1 year                                                                              | 37                               | (5.5%)  | 122                                  | (6.2%)  | 18                    | (11.2%) | 746                                     | (21.5%) | 239                    | (6.2%)  | 70                                  | (6.2%)  | 1103                                 | (17.8%) | 209                                | (7.3%)  |
| 1–5 years                                                                            | 121                              | (18.0%) | 154                                  | (7.9%)  | 15                    | (9.3%)  | 1439                                    | (41.5%) | 649                    | (16.9%) | 80                                  | (7.1%)  | 1236                                 | (19.9%) | 521                                | (18.3%) |
| >5 years                                                                             | 91                               | (13.6%) | 42                                   | (2.1%)  | 13                    | (8.1%)  | 357                                     | (10.3%) | 1313                   | (34.3%) | 42                                  | (3.7%)  | 919                                  | (14.8%) | 375                                | (13.2%) |
| Radiation source                                                                     |                                  |         |                                      |         |                       |         |                                         |         |                        |         |                                     |         |                                      |         |                                    |         |
| None                                                                                 | 137                              | (20.9%) | 175                                  | (9.8%)  | 2                     | (1.2%)  | 70                                      | (2.0%)  | 139                    | (3.7%)  | 144                                 | (12.7%) | 2076                                 | (36.3%) | 130                                | (4.5%)  |
| Sealed isotope                                                                       | 123                              | (18.8%) | 270                                  | (15.1%) | 21                    | (12.8%) | 2408                                    | (68.1%) | 1262                   | (33.2%) | 200                                 | (17.6%) | 508                                  | (8.9%)  | 517                                | (17.8%) |
| Unsealed isotope                                                                     | 166                              | (25.3%) | 478                                  | (26.7%) | 1                     | (0.6%)  | 36                                      | (1.0%)  | 232                    | (6.1%)  | 339                                 | (29.8%) | 274                                  | (4.8%)  | 904                                | (31.1%) |
| Radiation-generating device                                                          | 128                              | (19.5%) | 723                                  | (40.4%) | 133                   | (81.1%) | 909                                     | (25.7%) | 1566                   | (41.2%) | 369                                 | (32.5%) | 629                                  | (11.0%) | 1102                               | (37.9%) |
| Not sure                                                                             | 102                              | (15.5%) | 142                                  | (7.9%)  | 7                     | (4.3%)  | 111                                     | (3.1%)  | 604                    | (15.9%) | 85                                  | (7.5%)  | 2237                                 | (39.1%) | 251                                | (8.6%)  |
| Distance from radiation source                                                       |                                  |         |                                      |         |                       |         |                                         |         |                        |         |                                     |         |                                      |         |                                    |         |
| <1 m                                                                                 | 250                              | (39.2%) | 691                                  | (40.8%) | 6                     | (3.8%)  | 41                                      | (1.3%)  | 754                    | (20.4%) | 347                                 | (32.4%) | 757                                  | (13.7%) | 906                                | (33.2%) |
| 1–3 m                                                                                | 186                              | (29.2%) | 488                                  | (28.8%) | 22                    | (13.8%) | 266                                     | (8.1%)  | 1510                   | (40.8%) | 321                                 | (30.0%) | 1347                                 | (24.5%) | 726                                | (26.6%) |
| >3 m                                                                                 | 202                              | (31.7%) | 513                                  | (30.3%) | 132                   | (82.5%) | 2968                                    | (90.6%) | 1434                   | (38.8%) | 403                                 | (37.6%) | 3403                                 | (61.8%) | 1094                               | (40.1%) |
| While engaged in radiation work, white blood cell counts fell below the normal range |                                  |         |                                      |         |                       |         |                                         |         |                        |         |                                     |         |                                      |         |                                    |         |
| No                                                                                   | 611                              | (92.2%) | 1616                                 | (89.7%) | 155                   | (94.5%) | 3138                                    | (93.1%) | 3354                   | (88.1%) | 1038                                | (93.1%) | 5382                                 | (89.2%) | 2628                               | (92.5%) |
| Yes                                                                                  | 17                               | (2.6%)  | 36                                   | (2.0%)  | 4                     | (2.4%)  | 107                                     | (3.2%)  | 61                     | (1.6%)  | 26                                  | (2.3%)  | 172                                  | (2.8%)  | 75                                 | (2.6%)  |
| Not sure (or had never had a health examination.)                                    | 35                               | (5.3%)  | 149                                  | (8.3%)  | 5                     | (3.0%)  | 126                                     | (3.7%)  | 393                    | (10.3%) | 51                                  | (4.6%)  | 483                                  | (8.0%)  | 139                                | (4.9%)  |

BMI, body mass index.

**Supplemental Table S2.** Experience of medical radiation-related examination or procedure for diagnosis or treatment in the last 3 years.

|                                                                                                                | <b>Public<br/>Institute<br/>(n = 676)</b> | <b>Education<br/>Institute<br/>(n = 2010)</b> | <b>Military<br/>(n = 165)</b> | <b>Industrial<br/>Radiography<br/>(n = 3517)</b> | <b>Industry<br/>(n = 3886)</b> | <b>Research<br/>Institute<br/>(n = 1139)</b> | <b>Nuclear<br/>Power Plant<br/>(n = 6328)</b> | <b>Medical<br/>Institute<br/>(n = 2887)</b> | <b>Total<br/>(N = 20,608)</b> |
|----------------------------------------------------------------------------------------------------------------|-------------------------------------------|-----------------------------------------------|-------------------------------|--------------------------------------------------|--------------------------------|----------------------------------------------|-----------------------------------------------|---------------------------------------------|-------------------------------|
| Standard X-ray imaging (chest, abdomen, head, transcranial, or limbs)                                          |                                           |                                               |                               |                                                  |                                |                                              |                                               |                                             |                               |
| Never                                                                                                          | 74 (11.1%)                                | 366 (18.8%)                                   | 28 (17.2%)                    | 533 (15.6%)                                      | 554 (14.6%)                    | 106 (9.4%)                                   | 911 (14.8%)                                   | 212 (7.4%)                                  | 2784 (13.8%)                  |
| 1 time                                                                                                         | 142 (21.3%)                               | 494 (25.3%)                                   | 23 (14.1%)                    | 564 (16.5%)                                      | 794 (21.0%)                    | 195 (17.4%)                                  | 1304 (21.2%)                                  | 515 (18.0%)                                 | 4031 (20.0%)                  |
| 2 times                                                                                                        | 107 (16.0%)                               | 420 (21.5%)                                   | 18 (11.0%)                    | 537 (15.7%)                                      | 649 (17.2%)                    | 172 (15.3%)                                  | 1083 (17.6%)                                  | 456 (15.9%)                                 | 3442 (17.1%)                  |
| ≥ 3 times                                                                                                      | 344 (51.6%)                               | 669 (34.3%)                                   | 94 (57.7%)                    | 1792 (52.3%)                                     | 1786 (47.2%)                   | 650 (57.9%)                                  | 2857 (46.4%)                                  | 1678 (58.7%)                                | 9870 (49.0%)                  |
| Interoral radiography or panoramic radiography (face and mouth)                                                |                                           |                                               |                               |                                                  |                                |                                              |                                               |                                             |                               |
| Never                                                                                                          | 301 (46.9%)                               | 1228 (64.0%)                                  | 90 (58.1%)                    | 2103 (63.8%)                                     | 2391 (66.9%)                   | 633 (58.4%)                                  | 3950 (67.4%)                                  | 1568 (56.8%)                                | 12,264 (63.6%)                |
| 1 time                                                                                                         | 133 (20.7%)                               | 424 (22.1%)                                   | 30 (19.4%)                    | 706 (21.4%)                                      | 714 (20.0%)                    | 262 (24.2%)                                  | 1154 (19.7%)                                  | 724 (26.2%)                                 | 4147 (21.5%)                  |
| 2 times                                                                                                        | 83 (12.9%)                                | 166 (8.7%)                                    | 17 (11.0%)                    | 279 (8.5%)                                       | 294 (8.2%)                     | 112 (10.3%)                                  | 469 (8.0%)                                    | 300 (10.9%)                                 | 1720 (8.9%)                   |
| ≥ 3 times                                                                                                      | 125 (19.5%)                               | 101 (5.3%)                                    | 18 (11.6%)                    | 210 (6.4%)                                       | 177 (4.9%)                     | 77 (7.1%)                                    | 291 (5.0%)                                    | 167 (6.1%)                                  | 1166 (6.0%)                   |
| Computed tomography (CT)                                                                                       |                                           |                                               |                               |                                                  |                                |                                              |                                               |                                             |                               |
| Never                                                                                                          | 436 (69.8%)                               | 1577 (82.5%)                                  | 133 (85.8%)                   | 2737 (83.6%)                                     | 2551 (71.3%)                   | 772 (71.0%)                                  | 4298 (73.3%)                                  | 2133 (77.6%)                                | 14,637 (76.1%)                |
| 1 time                                                                                                         | 148 (23.7%)                               | 264 (13.8%)                                   | 17 (11.0%)                    | 398 (12.2%)                                      | 716 (20.0%)                    | 239 (22.0%)                                  | 1174 (20.0%)                                  | 469 (17.1%)                                 | 3425 (17.8%)                  |
| 2 times                                                                                                        | 22 (3.5%)                                 | 48 (2.5%)                                     | 4 (2.6%)                      | 87 (2.7%)                                        | 191 (5.3%)                     | 44 (4.0%)                                    | 260 (4.4%)                                    | 103 (3.7%)                                  | 759 (3.9%)                    |
| ≥ 3 times                                                                                                      | 19 (3.0%)                                 | 22 (1.2%)                                     | 1 (0.6%)                      | 52 (1.6%)                                        | 118 (3.3%)                     | 33 (3.0%)                                    | 131 (2.2%)                                    | 43 (1.6%)                                   | 419 (2.2%)                    |
| Fluoroscopy                                                                                                    |                                           |                                               |                               |                                                  |                                |                                              |                                               |                                             |                               |
| Never                                                                                                          | 579 (95.4%)                               | 1853 (98.1%)                                  | 150 (99.3%)                   | 3142 (97.1%)                                     | 3309 (95.5%)                   | 1009 (95.4%)                                 | 5457 (95.3%)                                  | 2654 (97.9%)                                | 18,153 (96.2%)                |
| 1 time                                                                                                         | 21 (3.5%)                                 | 28 (1.5%)                                     | 1 (0.7%)                      | 42 (1.3%)                                        | 109 (3.1%)                     | 37 (3.5%)                                    | 204 (3.6%)                                    | 42 (1.5%)                                   | 484 (2.6%)                    |
| 2 times                                                                                                        | 1 (0.2%)                                  | 5 (0.3%)                                      | 0 (0.0%)                      | 18 (0.6%)                                        | 24 (0.7%)                      | 7 (0.7%)                                     | 36 (0.6%)                                     | 13 (0.5%)                                   | 104 (0.6%)                    |
| ≥ 3 times                                                                                                      | 6 (1.0%)                                  | 3 (0.2%)                                      | 0 (0.0%)                      | 33 (1.0%)                                        | 23 (0.7%)                      | 5 (0.5%)                                     | 31 (0.5%)                                     | 3 (0.1%)                                    | 104 (0.6%)                    |
| Oral or intervenous administration of radioactive medicines for radiological medical examinations or treatment |                                           |                                               |                               |                                                  |                                |                                              |                                               |                                             |                               |
| Never                                                                                                          | 577 (94.6%)                               | 1826 (97.1%)                                  | 148 (98.0%)                   | 2066 (97.5%)                                     | 3259 (94.2%)                   | 967 (90.7%)                                  | 5308 (93.5%)                                  | 2562 (94.4%)                                | 16,713 (94.5%)                |
| 1 time                                                                                                         | 27 (4.4%)                                 | 49 (2.6%)                                     | 1 (0.7%)                      | 31 (1.5%)                                        | 145 (4.2%)                     | 85 (8.0%)                                    | 302 (5.3%)                                    | 128 (4.7%)                                  | 768 (4.3%)                    |
| 2 times                                                                                                        | 3 (0.5%)                                  | 5 (0.3%)                                      | 1 (0.7%)                      | 5 (0.2%)                                         | 33 (1.0%)                      | 9 (0.8%)                                     | 33 (0.6%)                                     | 18 (0.7%)                                   | 107 (0.6%)                    |
| ≥ 3 times                                                                                                      | 3 (0.5%)                                  | 1 (0.1%)                                      | 1 (0.7%)                      | 18 (0.8%)                                        | 24 (0.7%)                      | 5 (0.5%)                                     | 37 (0.7%)                                     | 7 (0.3%)                                    | 96 (0.6%)                     |
| Breast X-ray imaging (mammography for breast cancer diagnosis)                                                 |                                           |                                               |                               |                                                  |                                |                                              |                                               |                                             |                               |
| Never                                                                                                          | 569 (94.4%)                               | 1758 (92.5%)                                  | 147 (99.3%)                   | 3151 (98.5%)                                     | 3287 (96.9%)                   | 956 (91.7%)                                  | 5528 (98.1%)                                  | 2375 (86.9%)                                | 17,771 (95.3%)                |
| 1 time                                                                                                         | 19 (3.2%)                                 | 93 (4.9%)                                     | 1 (0.7%)                      | 24 (0.8%)                                        | 57 (1.7%)                      | 41 (3.9%)                                    | 74 (1.3%)                                     | 216 (7.9%)                                  | 525 (2.8%)                    |
| 2 times                                                                                                        | 7 (1.2%)                                  | 32 (1.7%)                                     | 0 (0.0%)                      | 5 (0.2%)                                         | 25 (0.7%)                      | 22 (2.1%)                                    | 14 (0.2%)                                     | 77 (2.8%)                                   | 182 (1.0%)                    |
| ≥ 3 times                                                                                                      | 8 (1.3%)                                  | 17 (0.9%)                                     | 0 (0.0%)                      | 18 (0.6%)                                        | 22 (0.6%)                      | 24 (2.3%)                                    | 18 (0.3%)                                     | 64 (2.3%)                                   | 171 (0.9%)                    |
| Interventional radiography or angiography                                                                      |                                           |                                               |                               |                                                  |                                |                                              |                                               |                                             |                               |
| Never                                                                                                          | 594 (98.3%)                               | 1874 (98.9%)                                  | 149 (99.3%)                   | 3196 (98.7%)                                     | 3396 (98.0%)                   | 1028 (97.4%)                                 | 5556 (97.3%)                                  | 2690 (99.1%)                                | 18,483 (98.2%)                |

|                                                                              | <b>Public<br/>Institute<br/>(n = 676)</b> | <b>Education<br/>Institute<br/>(n = 2010)</b> | <b>Military<br/>(n = 165)</b> | <b>Industrial<br/>Radiography<br/>(n = 3517)</b> | <b>Industry<br/>(n = 3886)</b> | <b>Research<br/>Institute<br/>(n = 1139)</b> | <b>Nuclear<br/>Power Plant<br/>(n = 6328)</b> | <b>Medical<br/>Institute<br/>(n = 2887)</b> | <b>Total<br/>(N = 20,608)</b> |
|------------------------------------------------------------------------------|-------------------------------------------|-----------------------------------------------|-------------------------------|--------------------------------------------------|--------------------------------|----------------------------------------------|-----------------------------------------------|---------------------------------------------|-------------------------------|
| 1 time                                                                       | 8 (1.3%)                                  | 17 (0.9%)                                     | 0 (0.0%)                      | 16 (0.5%)                                        | 46 (1.3%)                      | 24 (2.3%)                                    | 123 (2.2%)                                    | 19 (0.7%)                                   | 253 (1.3%)                    |
| 2 times                                                                      | 1 (0.2%)                                  | 2 (0.1%)                                      | 1 (0.7%)                      | 7 (0.2%)                                         | 12 (0.3%)                      | 3 (0.3%)                                     | 13 (0.2%)                                     | 3 (0.1%)                                    | 42 (0.2%)                     |
| ≥ 3 times                                                                    | 1 (0.2%)                                  | 1 (0.1%)                                      | 0 (0.0%)                      | 19 (0.6%)                                        | 10 (0.3%)                      | 0 (0.0%)                                     | 16 (0.3%)                                     | 3 (0.1%)                                    | 50 (0.3%)                     |
| Radiation therapy (External radiation therapy or internal radiation therapy) |                                           |                                               |                               |                                                  |                                |                                              |                                               |                                             |                               |
| Never                                                                        | 596 (98.3%)                               | 1885 (99.4%)                                  | 150 (100.0%)                  | 3196 (98.7%)                                     | 3414 (98.4%)                   | 1051 (99.2%)                                 | 5626 (98.5%)                                  | 2703 (99.6%)                                | 15,425 (98.9%)                |
| 1 time                                                                       | 7 (1.2%)                                  | 8 (0.4%)                                      | 0 (0.0%)                      | 19 (0.6%)                                        | 34 (1.0%)                      | 6 (0.6%)                                     | 58 (1.0%)                                     | 7 (0.3%)                                    | 120 (0.8%)                    |
| 2 times                                                                      | 1 (0.2%)                                  | 2 (0.1%)                                      | 0 (0.0%)                      | 5 (0.2%)                                         | 8 (0.2%)                       | 1 (0.1%)                                     | 10 (0.2%)                                     | 1 (0.0%)                                    | 23 (0.1%)                     |
| ≥ 3 times                                                                    | 2 (0.3%)                                  | 1 (0.1%)                                      | 0 (0.0%)                      | 19 (0.6%)                                        | 12 (0.3%)                      | 1 (0.1%)                                     | 16 (0.3%)                                     | 2 (0.1%)                                    | 34 (0.2%)                     |

**Supplemental Table S3.** Characteristics of exposed group and non-exposed group( $\leq 0.1\text{mSv}$ ) in the cohort.

| Characteristics                 | Exposed Group<br>(n = 12,065) |         | Non-Exposed Group<br>(n = 7462) |         |
|---------------------------------|-------------------------------|---------|---------------------------------|---------|
| Person-years                    |                               |         |                                 |         |
| Sum                             | 126,366.41                    |         | 32,448.97                       |         |
| Mean $\pm$ SD                   | 10.47 $\pm$ 6.14              |         | 4.35 $\pm$ 4.40                 |         |
| Median                          | 10.00                         |         | 3.00                            |         |
| Sex                             |                               |         |                                 |         |
| Men                             | 11,082                        | (91.9%) | 5861                            | (78.5%) |
| Women                           | 983                           | (8.1%)  | 1601                            | (21.5%) |
| Birth year                      |                               |         |                                 |         |
| ~1950                           | 78                            | (0.7%)  | 25                              | (0.3%)  |
| 1950–1959                       | 895                           | (7.4%)  | 346                             | (4.6%)  |
| 1960–1969                       | 2506                          | (20.8%) | 844                             | (11.3%) |
| 1970–1979                       | 4080                          | (33.8%) | 1639                            | (22.0%) |
| 1980–1989                       | 3929                          | (32.6%) | 3385                            | (45.4%) |
| 1990~                           | 577                           | (4.8%)  | 1223                            | (16.4%) |
| Cumulative radiation dose (mSv) |                               |         |                                 |         |
| Mean $\pm$ SD                   | 14.48 $\pm$ 28.80             |         |                                 |         |
| Smoking status, n(%)            |                               |         |                                 |         |
| Non-smoker                      | 4036                          | (33.7%) | 3874                            | (52.4%) |
| Ex-smoker                       | 2395                          | (20.0%) | 1092                            | (14.8%) |
| Smoker                          | 5533                          | (46.3%) | 2429                            | (32.9%) |
| Occupation, n(%)                |                               |         |                                 |         |
| Public institute                | 205                           | (2.8%)  | 439                             | (3.6%)  |
| Education institute             | 1288                          | (17.3%) | 517                             | (4.3%)  |
| Military                        | 80                            | (1.1%)  | 84                              | (0.7%)  |
| Industrial radiography          | 232                           | (3.1%)  | 3183                            | (26.4%) |
| Industry                        | 2178                          | (29.2%) | 1467                            | (12.2%) |
| Research institute              | 633                           | (8.5%)  | 438                             | (3.6%)  |
| Nuclear power plant             | 1956                          | (26.2%) | 4081                            | (33.9%) |
| Medical institute               | 890                           | (11.9%) | 1856                            | (15.4%) |
